# Supplementary material for: Efficient mRNA Delivery with mRNA Lipoplexes Prepared Using a Modified Ethanol Injection Method
Source: MDPI journal article supplement (doi:10.3390/pharmaceutics15041141), 2023-04-04
Supplement: s1 [file s1]

## *Supplementary Data*

### **Efficient mRNA Delivery with mRNA Lipoplexes Prepared using a Modified Ethanol Injection Method**

Min Tang, Ayane Sagawa, Nodoka Inoue, Satomi Torii, Kana Tomita and Yoshiyuki Hattori\*

Department of Molecular Pharmaceutics, Hoshi University, 2-4-41 Ebara, Shinagawa, Tokyo 142-8501, Japan

*Correspondence to:* Professor Yoshiyuki Hattori, Department of Molecular Pharmaceutics, Hoshi University, 2-4-41, Ebara, Shinagawa-ku, Tokyo 142-8501, Japan  
E-mail: yhattori@hoshi.ac.jp

#### **Materials and methods**

*Localization of Cy5-mRNA after intramuscular injection of mRNA lipoplexes into mice*  
mRNA lipoplexes, with 5 µg of CleanCap® Cy5-mRNA, were intramuscularly administered into mice. One and twenty-four hours after intramuscular injection, tissue samples were frozen on dry ice and sliced into 16 µm sections. The localization of Cy5-mRNA was examined using a fluorescent microscope (Eclipse TS100-F; Nikon Corporation).

## Results

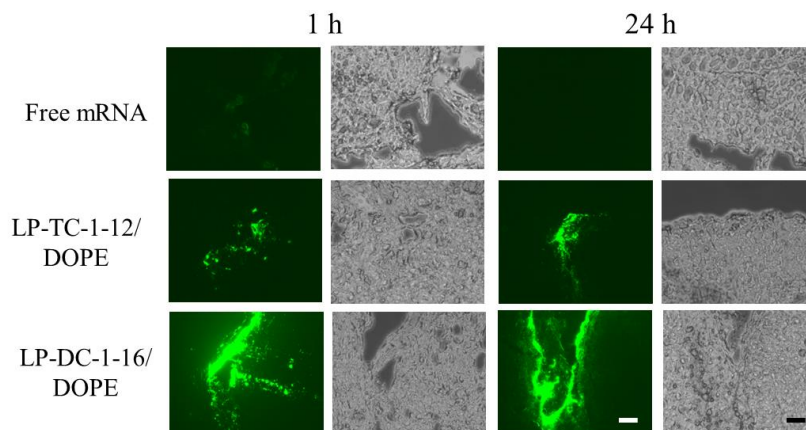

**Figure S1** Localization of mRNA in mice after intramuscular injection of mRNA lipoplexes. mRNA lipoplexes with 5  $\mu$ g of Cy5-mRNA were administered intramuscularly into mice. One or twenty-four hours after injection, tissue was frozen and sliced to observe localization of Cy5-mRNA (green) using a fluorescent microscope. Scale bar = 100  $\mu$ m.
